# Supplementary material
Source: publisher figshare collection journal article supplement (https://acs.figshare.com/ndownloader/files/3964195)
Supplement: Supplementary file 1 [file 3964195]

Supporting information for:

## **Specific Chemistry of the Anions: $[\text{TaOF}_5]^{2-}$ , $[\text{TaF}_6]^-$ and $[\text{TaF}_7]^{2-}$**

*Hongcheng Lu,<sup>†,‡</sup> Romain Gautier,<sup>‡</sup> Martin D. Donakowski,<sup>‡</sup> Lindsay Fuoco,<sup>‡</sup>*

*Zhengtang Liu,<sup>†</sup> Kenneth R. Poeppelmeier<sup>\*,‡</sup>*

<sup>†</sup>State Key Laboratory of Solidification Processing, School of Materials Science and Engineering, Northwestern Polytechnical University, 127 Youyixilu Road, Xi'an 710072, China

<sup>‡</sup>Department of Chemistry, Northwestern University, 2145 Sheridan Road, Evanston, IL 60208, USA

[hchlu@northwestern.edu](mailto:hchlu@northwestern.edu); [r-gautier@northwestern.edu](mailto:r-gautier@northwestern.edu);

[MartinDonakowski2014@u.northwestern.edu](mailto:MartinDonakowski2014@u.northwestern.edu); [Lindsay.Fuoco@northwestern.edu](mailto:Lindsay.Fuoco@northwestern.edu);

[liuzht@nwpu.edu.cn](mailto:liuzht@nwpu.edu.cn); [krp@northwestern.edu](mailto:krp@northwestern.edu)

\*Corresponding author Email: [krp@northwestern.edu](mailto:krp@northwestern.edu); Fax: +1-847-491-7713

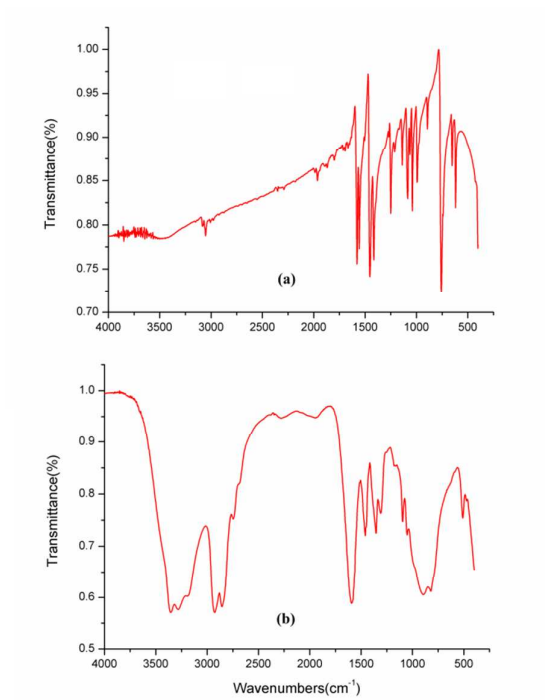

**Fig. S1** FTIR spectra of (a) 2,2'-bipyridyl; (b) Ethylenediamine.
